# Supplementary material for: Observation of large dielectric permittivity and dielectric relaxation phenomenon in Mn-doped lanthanum gallate
Source: Royal Society of Chemistry journal article supplement (doi:10.1039/c5ra28074e), 2016-01-01
Supplement: c5ra28074e1.pdf [file c5ra28074e1.pdf]

## Electronic Supplementary Information

### **Observation of Large Dielectric Permittivity and Dielectric Relaxation Phenomenon in Mn Doped Lanthanum Gallate**

Hari Mohan Rai<sup>1</sup>, Shailendra K. Saxena<sup>1</sup>, Ravikiran Late<sup>1</sup>, Vikash Mishra<sup>1</sup>, Parasmani Rajput<sup>2</sup>, Archana Sagdeo<sup>2</sup>, Rajesh Kumar<sup>1</sup> and P.R. Sagdeo<sup>1\*</sup>

<sup>1</sup>Material Research Lab. (MRL), Department of Physics and MSE; Indian Institute of Technology Indore, Simrol, Indore (M.P.) – 452020, India.

<sup>2</sup>Raja Ramanna Center for Advance Technology (RRCAT), Indore (M.P.) – 452013, India.

\* Corresponding author: [prs@iiti.ac.in](mailto:prs@iiti.ac.in)

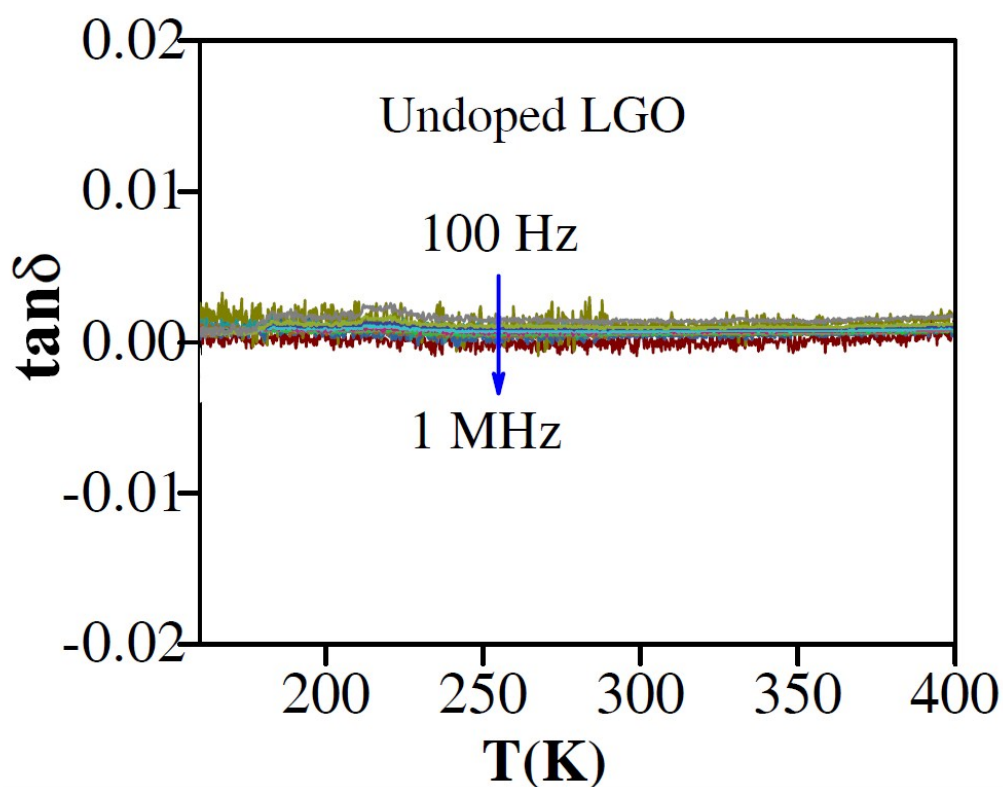

**Fig. S1:** (Color online) Dielectric loss ( $\tan\delta$ ) of  $\text{LaGaO}_3$  plotted as a function of temperature for probing frequencies ranging from 100 Hz to 1 MHz.

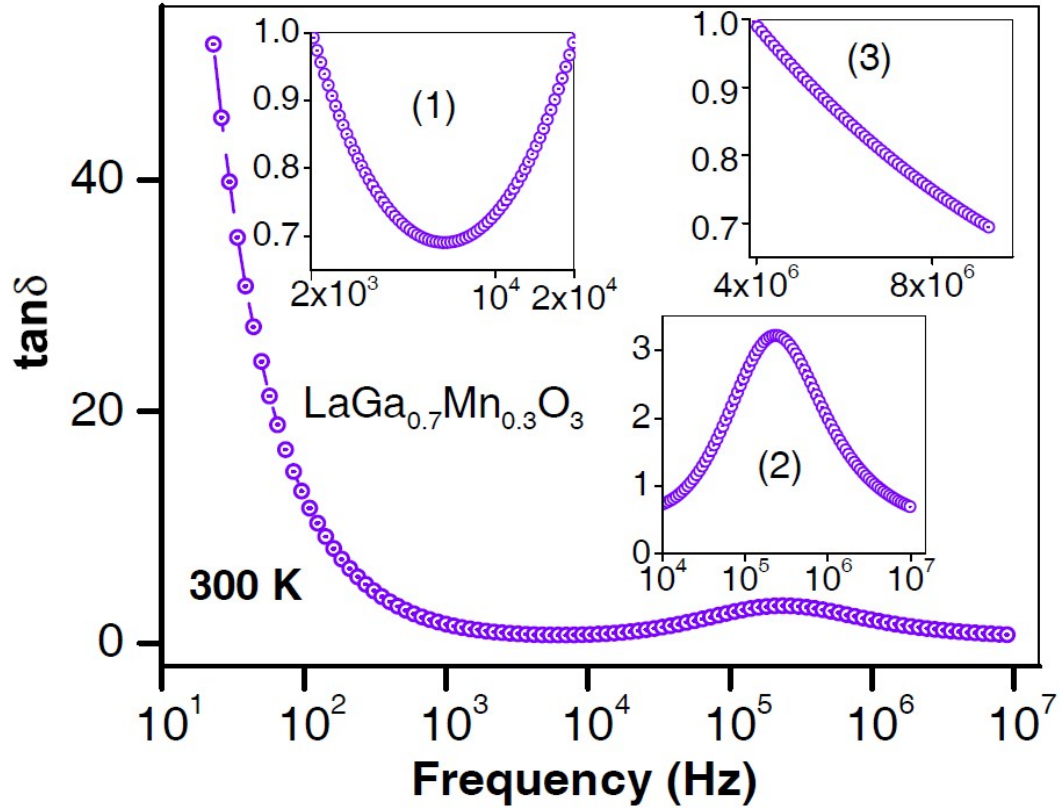

**Fig. S2:** (Color online) Dielectric loss ( $\tan\delta$ ) of  $\text{LaGa}_{0.7}\text{Mn}_{0.3}\text{O}_3$  plotted as a function of probing frequencies ranging from 20 Hz to 10 MHz. Inset-1 and 3 show that the value of  $\tan\delta$  is  $< 1$  for corresponding low (2 kHz to 20kHz) and high ( $>1\text{MHz}$ ) frequencies respectively. Inset-2 displays the magnified view of characteristic  $\tan\delta$ -peak.
